# Supplementary material for: A cross-modality enhancement of defensive flight via parvalbumin neurons in zona incerta
Source: eLife journal article supplement (doi:10.7554/elife.42728), 2019-04-15
Supplement: supp [file elife-42728-supp-v1.zip]

Archive with 14 entries (14 files):
- elife_poa_e42728_Figure_4_figure_supplement_1.pdf
- elife_poa_e42728_Transparent_Reporting_File.pdf
- elife_poa_e42728_Figure_3_figure_supplement_2.pdf
- elife_poa_e42728_Figure_3_source_data_1.xlsx
- elife_poa_e42728_Figure_2_figure_supplement_1.pdf
- elife_poa_e42728_Figure_4_source_data_1.xlsx
- elife_poa_e42728_Figure_1_figure_supplement_1.pdf
- elife_poa_e42728_Figure_4_figure_supplement_2.pdf
- elife_poa_e42728_Figure_2_source_data_1.xlsx
- elife_poa_e42728_Supplementary_file_1.pdf
- elife_poa_e42728_Figure_3_figure_supplement_1.pdf
- elife_poa_e42728_Figure_3_figure_supplement_3.pdf
- elife_poa_e42728_Figure_1_figure_supplement_2.pdf
- elife_poa_e42728_Figure_1_source_data_1.xlsx
