# Supplementary material for: A cross-modality enhancement of defensive flight via parvalbumin neurons in zona incerta
Source: eLife journal article supplement (doi:10.7554/elife.42728), 2019-04-15
Supplement: supp [file elife-42728-supp-v1.zip › elife_poa_e42728_Figure_1_source_data_1.xlsx]

## Sheet: Figure 1
Fig. 1B		Fig. 1C		Fig. 1E		Fig. 1F
contr	whisk	contr	whisk	contr	whisk	contr	whisk
9.45395	13.9958	48.9668	88.6401	28.8933	30.497	59.2905	74.0881
11.7496	17.2788	56.5015	128.468	28.0996	27.4228	57.2969	55.7656
11.2312	13.6502	38.0133	74.5579	28.4992	33.1116	62.736	76.6253
10.7632	12.0759	52.9522	54.932	25.9901	23.5423	56.9875	48.0997
11.9511	14.4962	49.1221	67.3816	19.1038	18.9418	42.1348	37.5025
11.9223	15.9828	77.4952	104.234
15.1066	17.6243	77.5724	110.13

## Sheet: Figure1 - figure supplement 1
B		C				D
contr	whisk	Light		No light Control		Light		No light Control
1.32183	0.535642	Mean	SD	Mean	SD	Mean	SD	Mean	SD
1.3	0.54	1.51475	0.323671	1	0.278849	2.47067	0.829639	1	0.334695
1.25585	0.380133	1.39286	0.177909	1	0.278849	1.75472	0.256008	1	0.178409
0.28414	0.165108	1.17551	0.131629	1	0.180545	1.57673	0.261601	1	0.242735
0.614116	2.90571	1.23871	0.195319	1	0.143148	1.49259	0.376276	1	0.393949
0.900415	2.2616	1.18182	0.007363	1	0.318354	2.89479	0.573266	1	0.406023
		1.05533	0.137056	1	0.14374	1.52531	0.314337	1	0.311315
		1.11149	0.0314817	1	0.174611	1.38772	0.17683	1	0.396614

## Sheet: Figure1 - figure supplement 2
B
Normal	Trimmed
30.6748	12.5
18.8679	2.47158
17.1233	14.4928
19.6078	4.22654
8.06452	6.01685
18.9394	6.8306
9.70874	4.90196
