# Supplementary material for: A cross-modality enhancement of defensive flight via parvalbumin neurons in zona incerta
Source: eLife journal article supplement (doi:10.7554/elife.42728), 2019-04-15
Supplement: supp [file elife-42728-supp-v1.zip › elife_poa_e42728_Figure_2_source_data_1.xlsx]

## Sheet: Figure 2
Fig. 2D		Fig. 2E		Fig. 2G		Fig. 2H		Fig. 2K
OFF	ON	OFF	ON	contr	whisk	contr	whisk	275
13.463	19.0786	18.0991	26.6588	23.1103	19.346	48.4489	38.0503	408
15.4789	19.1918	38.1897	47.8652	14.6869	16.7542	34.2443	31.1959	52
17.7017	25.5042	38.3575	39.1796	18.7427	20.1406	45.6459	39.2835	26
24.4458	26.3555	74.8689	79.8431	27.0629	24.8382	53.2963	45.792	20
17.0422	18.4937	39.723	44.9158	21.3465	23.6143	39.8023	44.83	90
9.82816	14.9212	27.1647	32.0419					34
12.2956	15.0691	28.7432	34.7441					60

## Sheet: Figure2 - figure supplement 1
A				B				C
Light		No light Control		Light		No light Control		OFF	ON
Mean	SD	Mean	SD	Mean	SD	Mean	SD	0.221744	3.16443
1.24567	0.2389	1	0.253996	1.5579	0.416426	1	0.635186	1.42694	1.94282
1.11836	0.071015	1	0.178906	1.2757	0.237506	1	0.193298	1.45199	0.008985
1.08999	0.124835	1	0.166968	1.26056	0.291305	1	0.317254	0.418146	0.630329
1.04338	0.067718	1	0.128786	1.24141	0.105867	1	0.203279	1.69764	1.13107
1.16216	0.190827	1	0.109846	1.00503	0.182548	1	0.208906
1.08378	0.178968	1	0.144668	1.06956	0.221569	1	0.192162
1.12581	0.078771	1	0.054465	0.951064	0.210958	1	0.167949
