# Supplementary material for: A cross-modality enhancement of defensive flight via parvalbumin neurons in zona incerta
Source: eLife journal article supplement (doi:10.7554/elife.42728), 2019-04-15
Supplement: supp [file elife-42728-supp-v1.zip › elife_poa_e42728_Figure_3_source_data_1.xlsx]

## Sheet: Figure 3
Fig. 3B		Fig. 3C		Fig. 3E		Fig. 3F		Fig. 3H		Fig. 3I		Fig. 3L
OFF	ON	OFF	ON	OFF	ON	OFF	ON	contr	whisk	contr	whisk	whisk	noise	noise+whisk
19.6978	28.3372	54.5164	75.7904	23.5033	19.6006	71.1744	60.2161	24.8555	19.9743	26.3691	40.3701	15.6667	27.4333	32.1
24.7975	29.2085	55.9563	75.9018	27.826	24.3253	82.6465	65.4865	14.5971	21.5432	60.8364	41.0644	15.6111	27.1	30.0667
35.361	39.5104	55.1521	66.6053	23.4852	18.2738	60.9288	47.7407	13.4256	11.715	24.4052	20.5984	16.0556	19.9	24.5
34.3113	43.3217	59.1958	61.9789	25.9295	21.2145	81.6258	73.5961	12.1889	15.3435	17.2948	19.4451	14.5556	18.3	20.6333
22.6599	32.2866	60.8756	73.3113	26.4851	23.3526	71.0414	68.5112	15.6891	14.84	24.5445	24.7241	14.4444	19.9333	23
28.7074	38.6797	67.706	81.0995					24.1557	20.6101	37.9053	38.7217	13.2778	13.0667	16.7333
								17.2926	14.998	31.3817	29.7223	11.6111	22.1	31.2667
								19.0757	12.8554	35.1104	26.7697	12.8333	20.7667	29.3667
												11.8333	8.93333	20.8667
												10.65	13.35	17.6
												22.825	25.35	31.7
												7.075	14.4	16.9
												5.83333	8.9	10.1667
												7	8.05	10.8333
												5.5	7.3	8.61111
												7.55	8.85	11.1818
												8.55	17.85	23.2727
												7.825	14.15	20
												6.975	15.3	18.9091
												7.225	15	19.2273
												7.55	8.85	11.1818
												8.55	17.85	23.2727

## Sheet: Figure3 - figure supplement 1
B	C	D				E				F				H
100	24	Light		No light Control		Light		No light Control		Light		No light Control		Light		No light Control
100	32	Mean	SD	Mean	SD	Mean	SD	Mean	SD	Mean	SD	Mean	SD	Mean	SD	Mean	SD
100	23	1.13791	0.163346	1	0.108546	1.51927	0.456516	1	0.215937	0.910081	0.142769	1	0.091221	0.849684	0.155316	1	0.148102
100	18	1.10509	0.150574	1	0.096619	1.23885	0.248005	1	0.254181	0.893798	0.049604	1	0.088057	0.833889	0.198198	1	0.154655
90		1.10836	0.125638	1	0.158147	1.16461	0.356365	1	0.365399	0.910817	0.107325	1	0.105202	0.880541	0.207429	1	0.143232
		1.14175	0.194772	1	0.132696	1.18965	0.248602	1	0.253988	0.883281	0.125148	1	0.154895	0.762399	0.230916	1	0.309516
		1.1292	0.204535	1	0.145803	1.19194	0.306704	1	0.280126	0.980613	0.076153	1	0.065884	0.860037	0.239813	1	0.19566
		1.1313	0.124961	1	0.13296	1.25465	0.379169	1	0.254494

## Sheet: Figure3 - figure supplement 2
A		B
OFF	ON	OFF	ON
3.48858	1.15153	0.19836	0.211146
2.40417	2.38447	0.917502	3.505
1.72788	2.01493	2.98031	5.02743
1.195	1.87336	5.25875	5.94337

## Sheet: Figure3 - figure supplement 3
B			C
before	CNO	wash out	before	after
60	80	60	6	1
40	60	40	22	5
60	100	60	32	1
140	160	140	4	1
20	60	20	5	2
60	100	60	20	2
