# Supplementary material for: A cross-modality enhancement of defensive flight via parvalbumin neurons in zona incerta
Source: eLife journal article supplement (doi:10.7554/elife.42728), 2019-04-15
Supplement: supp [file elife-42728-supp-v1.zip › elife_poa_e42728_Figure_4_source_data_1.xlsx]

## Sheet: Figure 4
Fig. 4D		Fig. 4E		Fig. 4G		Fig. 4H		Fig. 4J		Fig. 4K
OFF	ON	OFF	ON	OFF	ON	OFF	ON	OFF	ON	OFF	ON
37.0882	36.3205	91.4049	97.0177	32.2297	43.1753	86.4874	116.525	34.8167	26.2292	99.2161	71.416
35.9926	38.2173	92.9698	99.1639	22.7051	25.738	45.5001	74.9213	29.6619	35.5683	75.2706	89.3067
46.1343	45.0186	104.673	89.7012	27.8558	30.3563	76.2711	90.4499	30.1169	25.0499	71.3872	65.8602
58.0218	65.8839	113.687	108.307	29.7123	35.4511	87.4849	102.474	35.9398	33.2616	89.504	116.614
38.6812	43.9226	94.739	90.2562	24.0627	33.4949	63.6872	82.6573	33.2184	33.8736	85.8214	62.6211
								21.8144	21.7317	106.718	130.5
								33.8736	33.2184	76.4747	64.0592

## Sheet: Figure4 - figure supplement 1
Mean	SD
1.72731	0.728312
0.349054	0.10327
19.567	2.95882
0.537395	0.419874
9.90223	3.10746
15.3475	4.02224
12.2438	2.42706
16.6217	1.29703
21.4416	3.75814
0.0701317	0.0187881
0.834619	0.27839
0.303414	0.18583
0.496016	0.359924
0.178183	0.0354062
0.194502	0.0524619
0.18561	0.0294726

## Sheet: Figure4 - figure supplement 2
A				B				C
Light		No light Control		Light		No light Control		OFF	ON
mean	SD	mean	SD	mean	SD	mean	SD	2.67337	4.72522
1.4056	0.348246	1	0.117635	2.5552	1.26145	1	0.319921	1.37193	4.58971
1.1149	0.156248	1	0.093431	1.5413	0.392957	1	0.415336	1.6242	4.88488
1.1152	0.170352	1	0.104942	1.1872	0.330813	1	0.295684	3.48979	3.43001
1.12224	0.118367	1	0.082693	1.31104	0.348969	1	0.268178	1.44986	1.40805
1.10554	0.101385	1	0.135581	1.29218	0.166569	1	0.367733
