# Supplementary material for: A cross-modality enhancement of defensive flight via parvalbumin neurons in zona incerta
Source: eLife journal article supplement (doi:10.7554/elife.42728), 2019-04-15
Supplement: supp [file elife-42728-supp-v1.zip › elife_poa_e42728_Supplementary_file_1.pdf]

|             | Response Latency |                  |         | Time to Peak     |                  |         |
|-------------|------------------|------------------|---------|------------------|------------------|---------|
|             | Control (s)      | Manipulation (s) | p-value | Control (s)      | Manipulation (s) | p-value |
| Figure 1A-C | 0.171±0.049      | 0.157±0.054      | 0.604   | 1.843±0.730      | 1.814±0.876      | 0.937   |
| Figure 1D-F | 0.400±0.255      | 0.520±0.683      | 0.569   | 1.940±0.428      | 2.040±0.230      | 0.528   |
| Figure 2C-E | 0.544±0.341      | 0.600±0.386      | 0.955   | 1.900±0.753      | 2.481±0.964      | 0.129   |
| Figure 2F-H | 0.720±0.192      | 0.560±0.270      | 0.327   | 1.700±0.579      | 1.920±0.482      | 0.585   |
| Figure 3A-C | 0.443±0.237      | 0.491±0.221      | 0.066   | 2.514±1.320      | 2.757±1.655      | 0.716   |
| Figure 3D-F | 0.700±0.430      | 0.740±0.365      | 0.597   | 2.940±1.161      | 2.800±0.656      | 0.786   |
| Figure 3G-I | 0.675±0.362      | 0.550±0.359      | 0.499   | 1.738±0.537      | 1.388±0.564      | 0.224   |
| Figure 4C-E | 0.800±0.430      | 0.840±0.261      | 0.862   | 2.260±0.796      | 2.400±0.946      | 0.505   |
| Figure 4F-H | 0.400±0.187      | 0.700±0.367      | 0.259   | 3.760±1.240      | 2.860±0.602      | 0.061   |
| Figure 4I-K | 0.5000±0.14<br>1 | 0.5200±0.239     | 0.799   | 2.5000±0.59<br>3 | 2.2830±0.568     | 0.734   |

**Supplemental file 1** Analysis of temporal profiles of speed traces in different sets of experiments. Data are presented as mean ± SD. Two-sided paired t-test were performed to compared values between control and manipulation conditions. The type of experiment is shown by the corresponding figure number in main figures.
