# Supplementary figures and images for: A cross-modality enhancement of defensive flight via parvalbumin neurons in zona incerta
Source: eLife journal article supplement (doi:10.7554/elife.42728), 2019-04-15

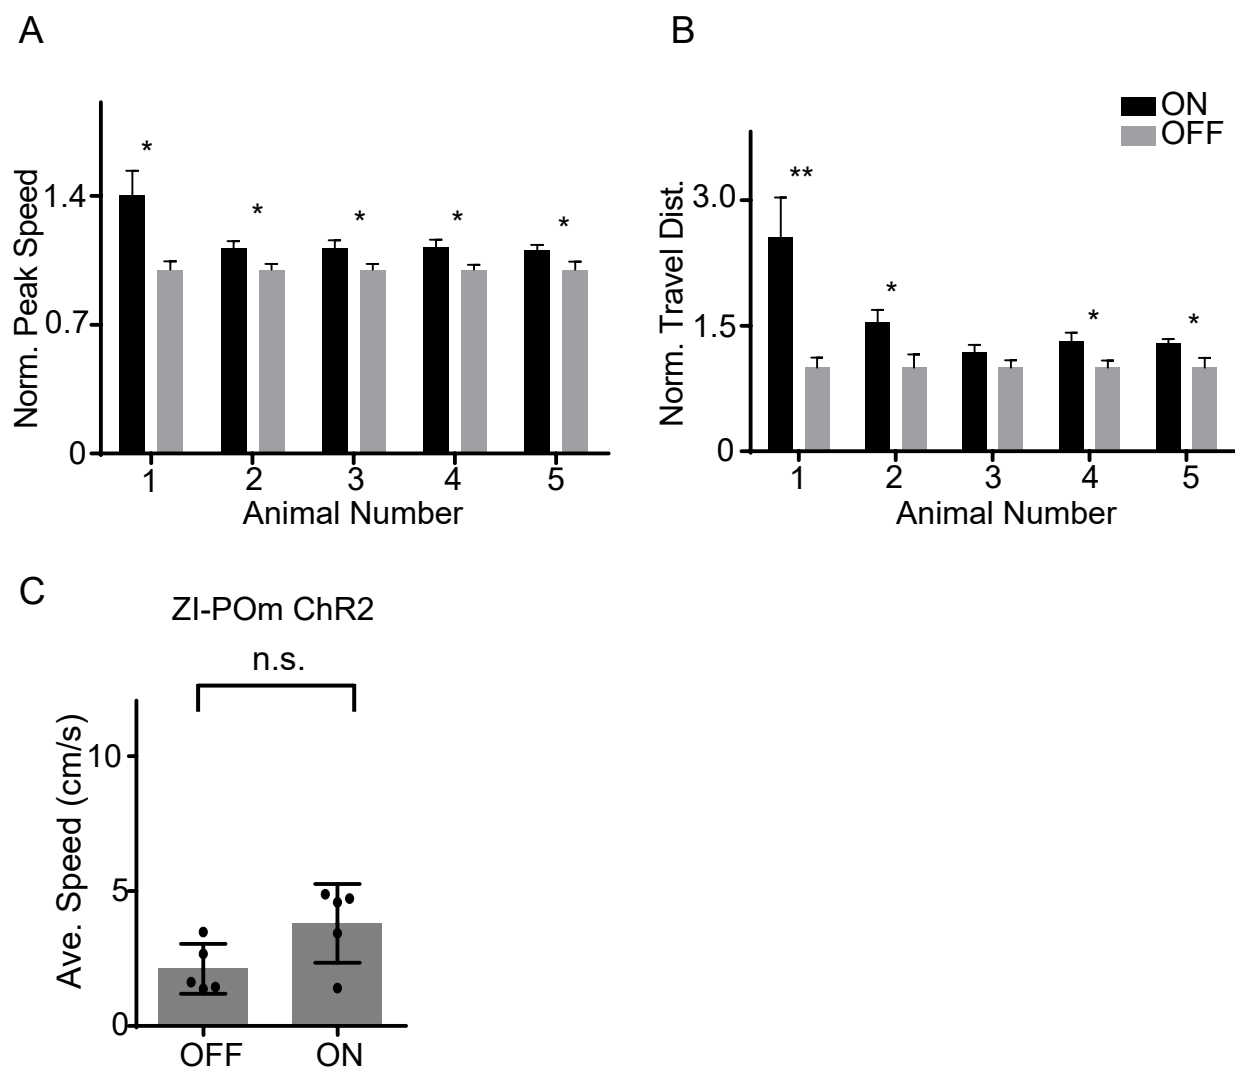

Figure 4 - figure supplement 2

Supplement: supp [file elife-42728-supp-v1.zip]

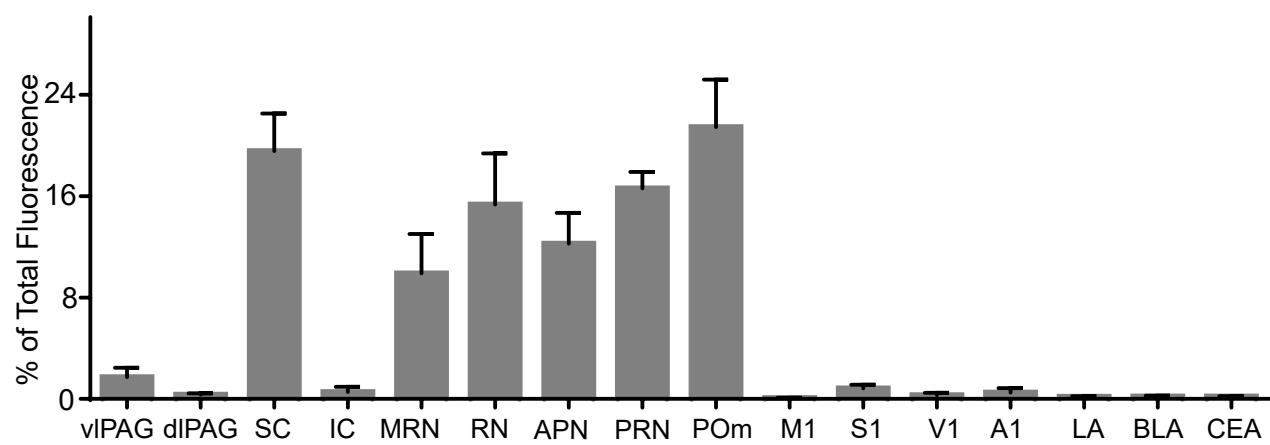

Figure 4 - figure supplement 1

Supplement: supp [file elife-42728-supp-v1.zip › elife_poa_e42728_Figure_4_figure_supplement_1.pdf]

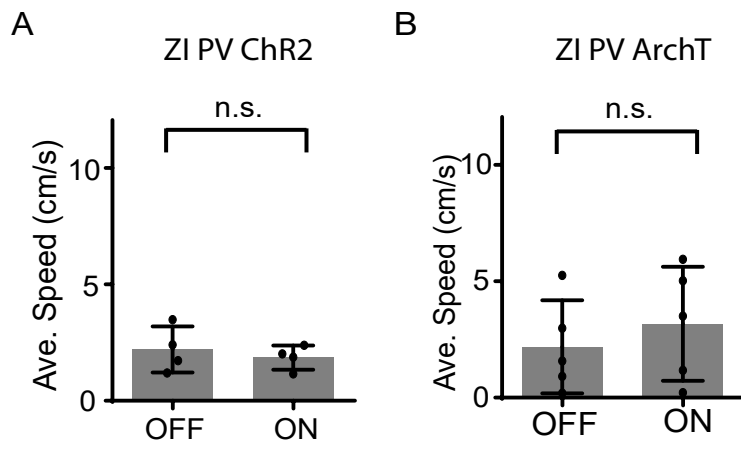

Figure 3 - figure supplement 2

Supplement: supp [file elife-42728-supp-v1.zip › elife_poa_e42728_Figure_3_figure_supplement_2.pdf]

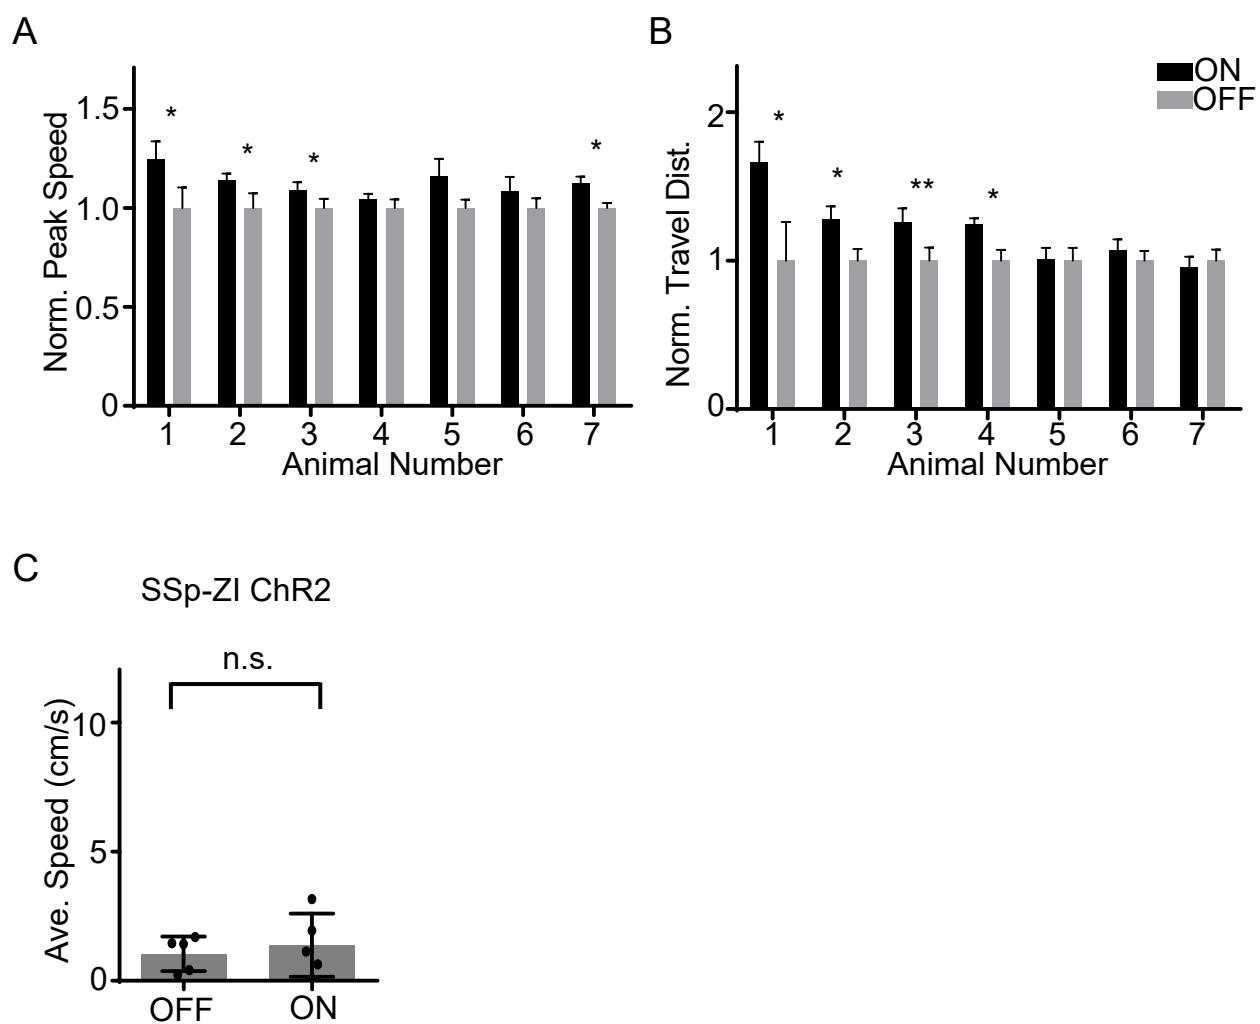

Figure 2 - figure supplement 1

Supplement: supp [file elife-42728-supp-v1.zip › elife_poa_e42728_Figure_2_figure_supplement_1.pdf]

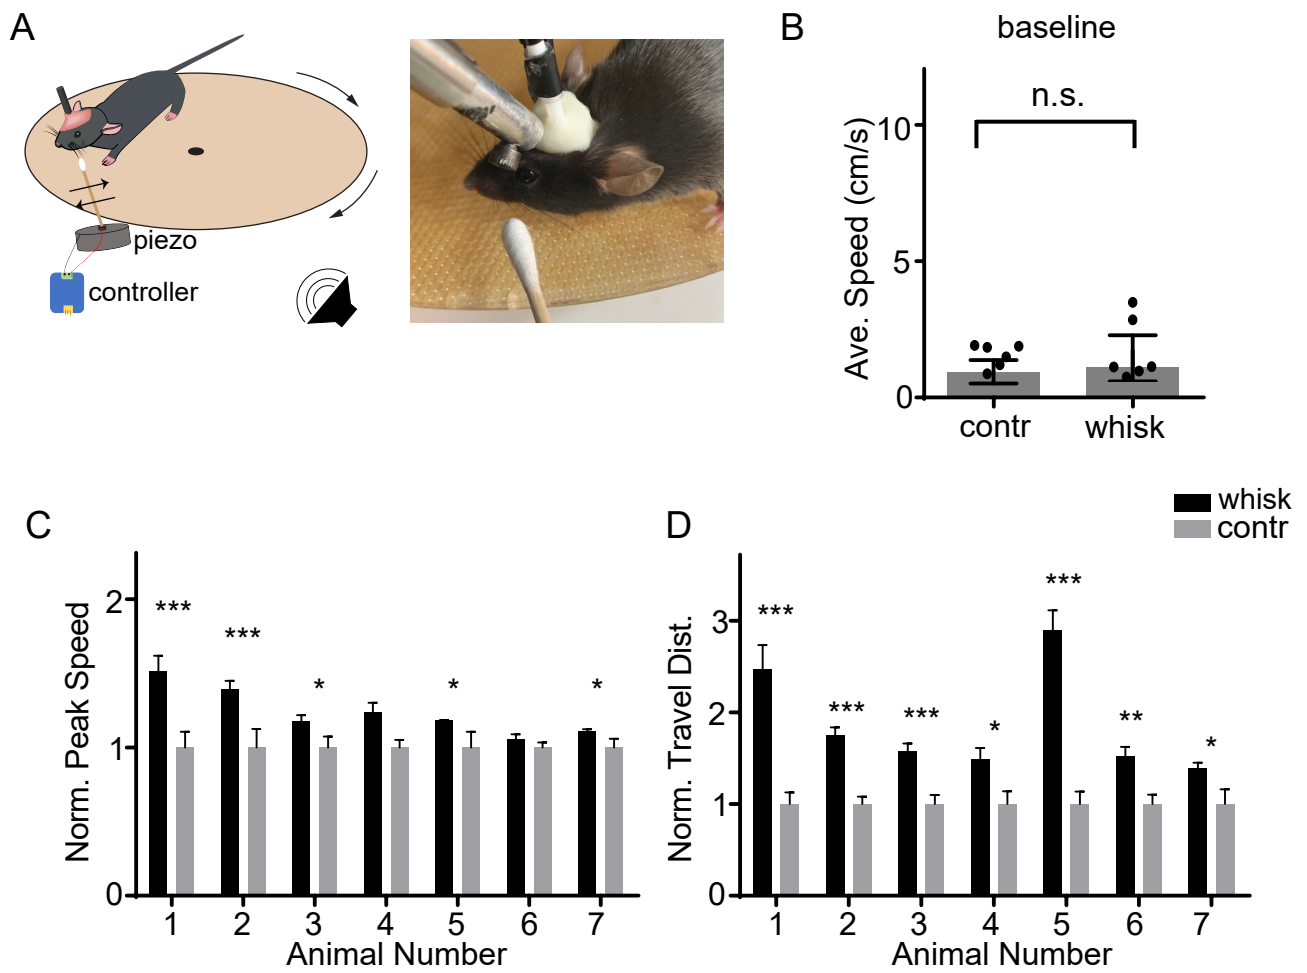

Figure 1 - figure supplement 1

Supplement: supp [file elife-42728-supp-v1.zip › elife_poa_e42728_Figure_1_figure_supplement_1.pdf]

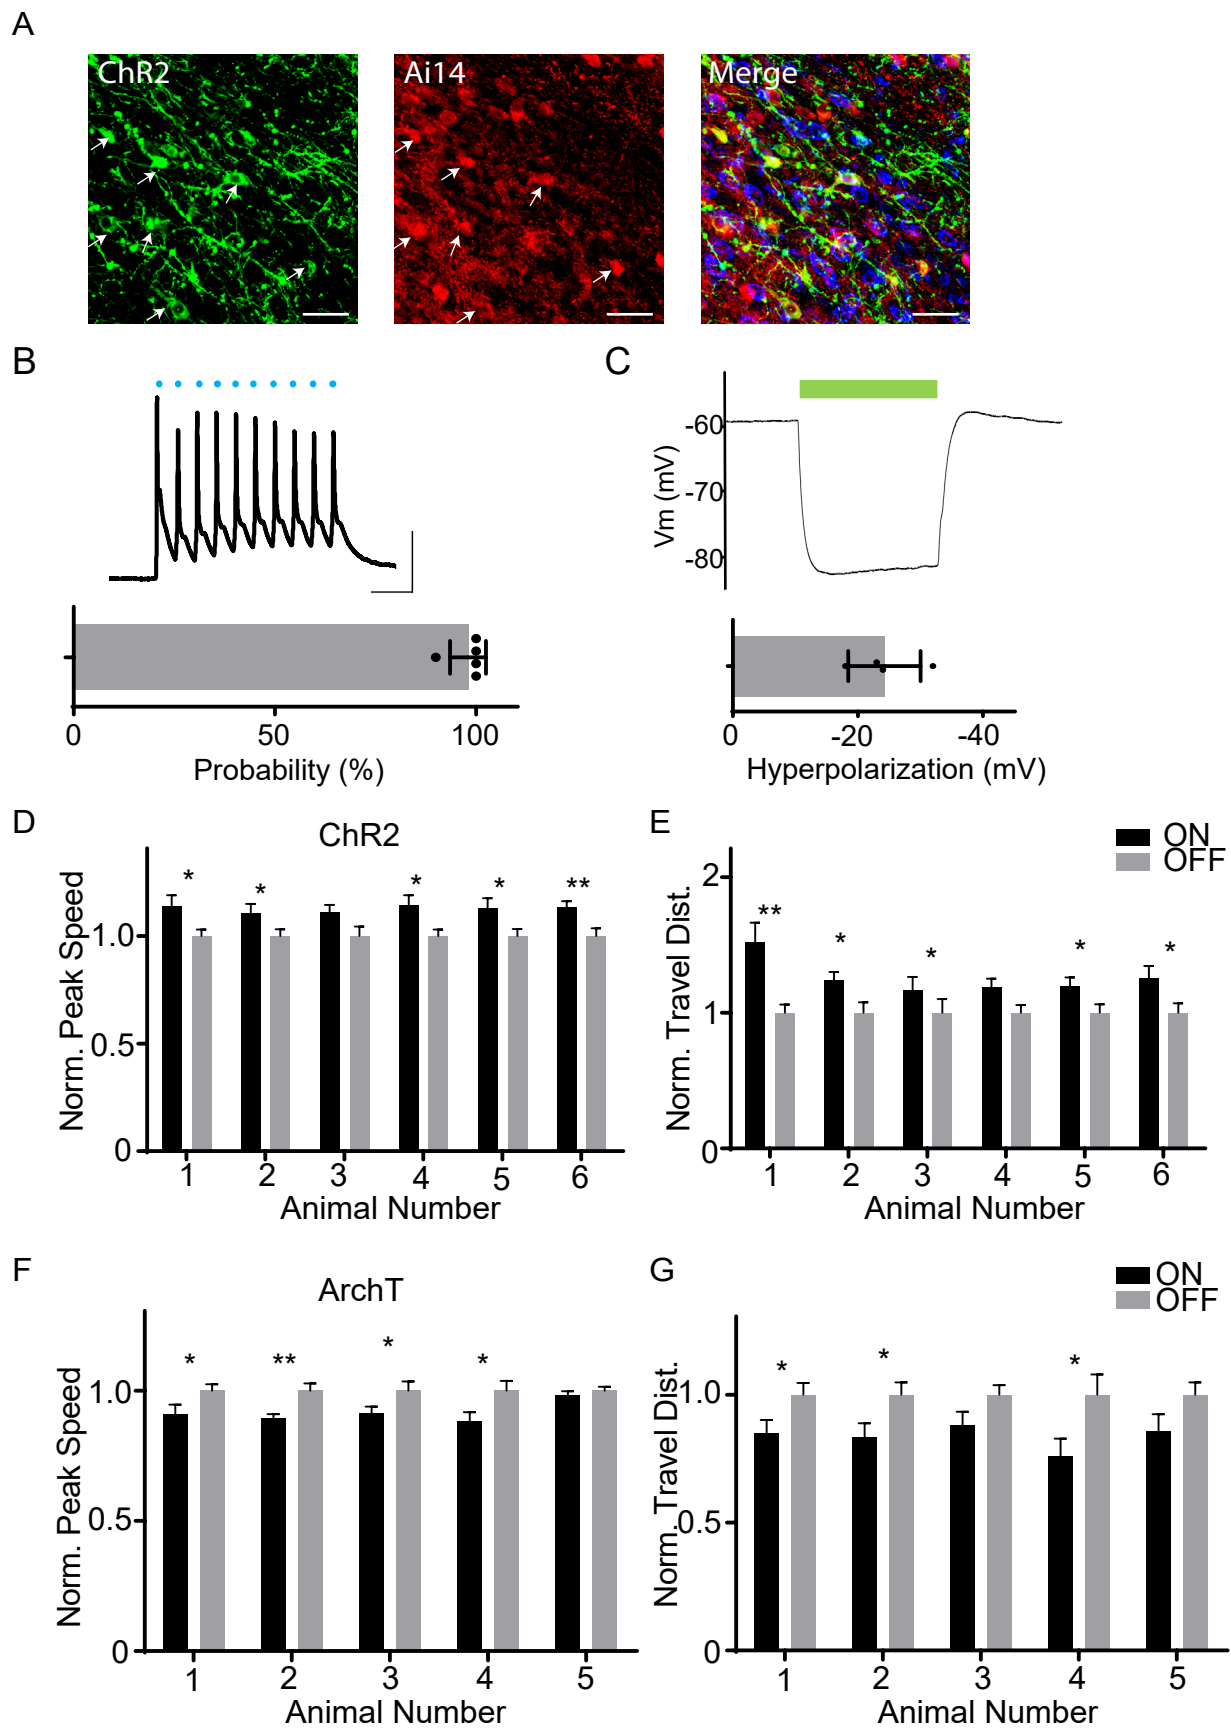

Figure 3 - figure supplement 1

Supplement: supp [file elife-42728-supp-v1.zip › elife_poa_e42728_Figure_3_figure_supplement_1.pdf]

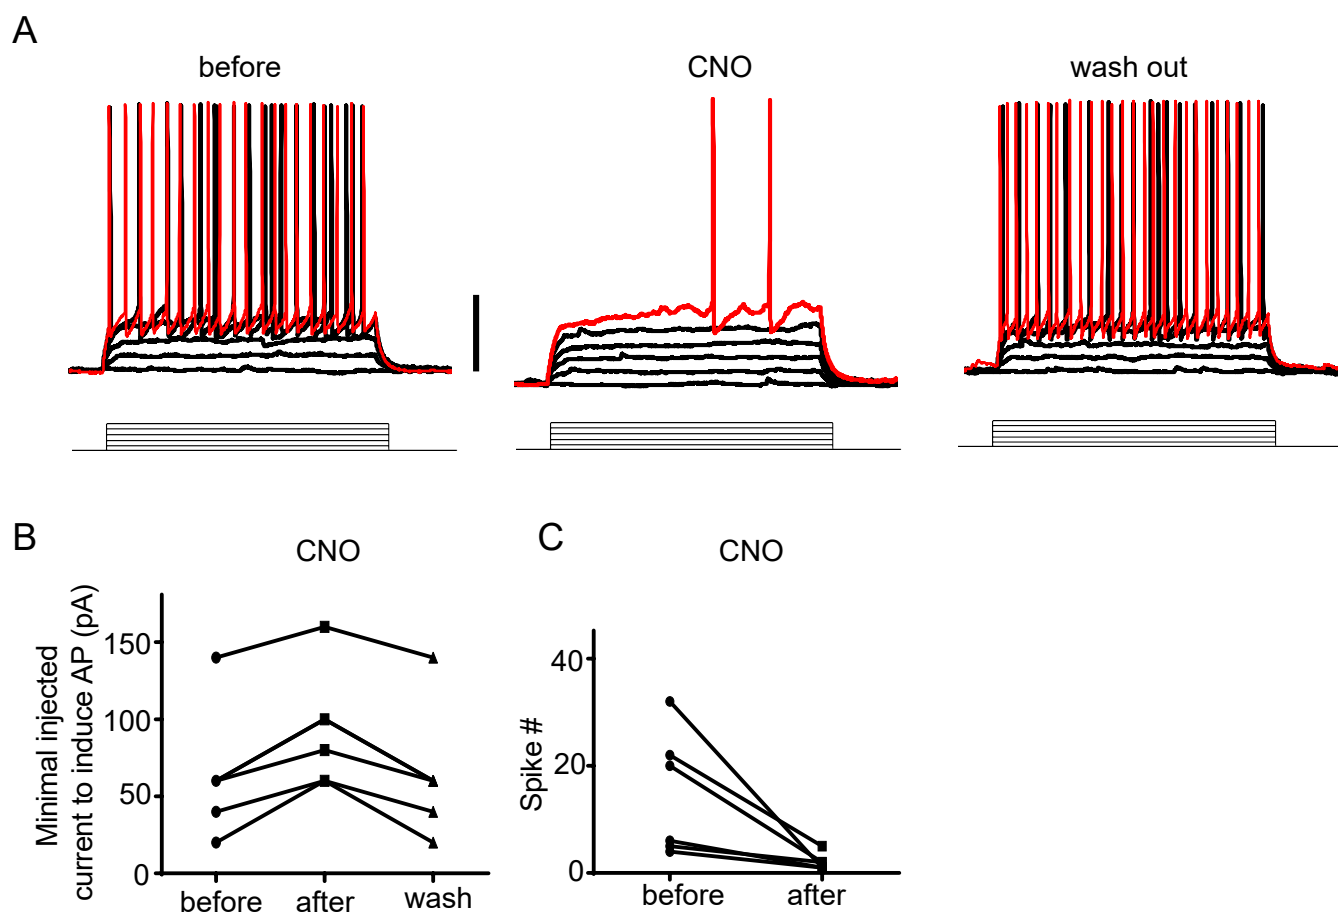

Figure 3 - figure supplement 3

Supplement: supp [file elife-42728-supp-v1.zip › elife_poa_e42728_Figure_3_figure_supplement_3.pdf]

A

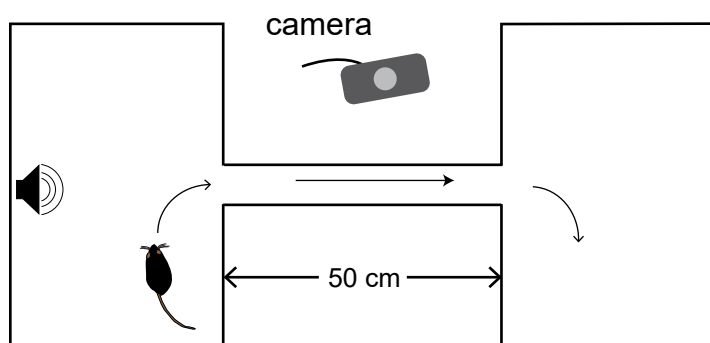

B

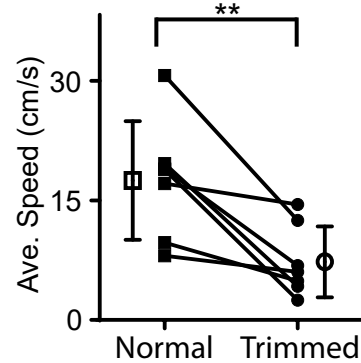

Figure1 - figure supplement 2

Supplement: supp [file elife-42728-supp-v1.zip › elife_poa_e42728_Figure_1_figure_supplement_2.pdf]
